# Supplementary figures and images for: Repression of Carotenoid Accumulation by Nitrogen and NH4+ Supply in Carrot Callus Cells In Vitro
Source: MDPI journal article supplement (doi:10.3390/plants10091813), 2021-08-31

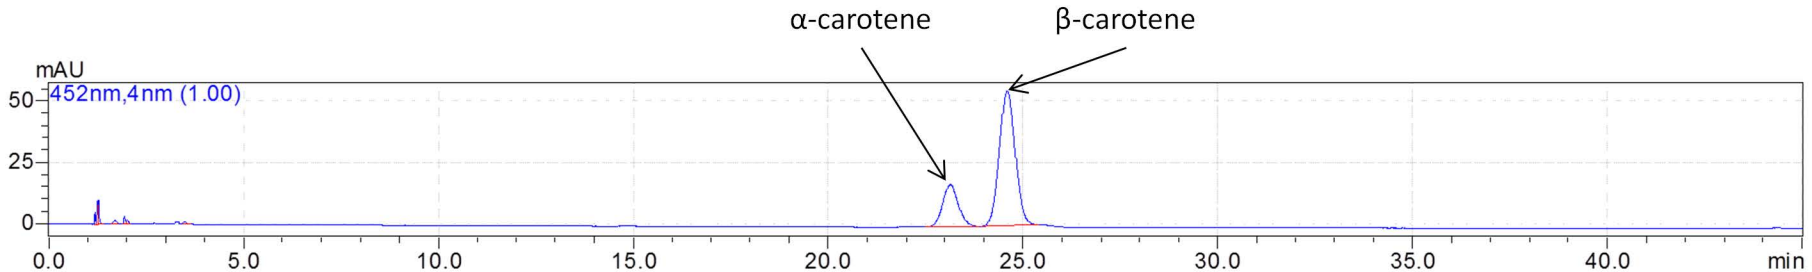

Supplement: s1 [file s1]
